# Supplementary material
Source: publisher site journal article supplement (https://www.kjim.org/upload/media/kjim-2024-034-Supplementary-Table-1.pdf)
Supplement: Supplementary file 1 [file kjim-2024-034-Supplementary-Table-1.pdf]

**Supplementary Table 1. Number of KOCOSS-enrolled hospitals in each region**

| Location                | Number of hospitals |
|-------------------------|---------------------|
| Seoul                   | 19                  |
| Gyeonggi province       | 14                  |
| Gangwon province        | 3                   |
| Gyeongsangbuk province  | 3                   |
| Gyeongsangnam province  | 4                   |
| Jeollabuk province      | 1                   |
| Jeollanam province      | 1                   |
| Chungcheongbuk province | 1                   |
| Chungcheongnam province | 1                   |
| Jeju province           | 1                   |

KOCOSS, KOREA COPD Subgroup Study; COPD, chronic obstructive pulmonary disease.

The participant tertiary hospitals provide specialised health-care for a minimum of 20 medical specialties, with a full suite of essential services in internal medicine; surgery; paediatrics; obstetrics and gynaecology; radiology; anaesthesiology; laboratory medicine; pathology; mental health and dentistry. The university-affiliated hospitals are tertiary referral hospitals. All hospitals have a bed capacity of 400 to 2,800, function as an emergency medical centre for each region and have been designed to provide residency trainings. Most of the patients were referred from primary care clinics and all the hospitals have a pulmonary department. The number of pulmonologists in each hospital ranges from 2–29.
